# Supplementary material for: Antiherpetic Activity of Carrageenan Complex with Echinochrome A and Its Liposomal Form
Source: MDPI journal article supplement (doi:10.3390/ijms232415754), 2022-12-12
Supplement: s1 [file s1]

## Supplementary Materials:

**Table S1. Antiherpetic activity of the liposomal form of  $\Sigma$ -CRG/Ech**

| Compounds                          | CC <sub>50</sub> | Pretreatment<br>of virus |                 | Pretreatment<br>of cells |               | Simultaneous<br>treatment |               | Treatment of<br>infected cells |               |
|------------------------------------|------------------|--------------------------|-----------------|--------------------------|---------------|---------------------------|---------------|--------------------------------|---------------|
|                                    |                  | IC <sub>50</sub>         | SI              | IC <sub>50</sub>         | SI            | IC <sub>50</sub>          | SI            | IC <sub>50</sub>               | SI            |
|                                    |                  | ( $\mu$ /mL)             |                 | ( $\mu$ /mL)             |               | ( $\mu$ /mL)              |               | ( $\mu$ /mL)                   |               |
| <b>Liposomes</b>                   | >2000            | 9.5 $\pm$                | 211             | 57 $\pm$ 7               | 35 $\pm$      | 47 $\pm$ 6                | 42 $\pm$      | 68 $\pm$ 9*                    | 29            |
| <b><math>\Sigma</math>-CRG/Ech</b> |                  | 1,1*                     | $\pm$ 23*       |                          | 5*            |                           | 6             |                                | $\pm$ 4*      |
| <b><math>\Sigma</math>-CRG/Ech</b> | >1000            | 2.8 $\pm$<br>0.4         | 350<br>$\pm$ 54 | 55 $\pm$ 7               | 18 $\pm$<br>3 | 31 $\pm$ 5                | 32 $\pm$<br>5 | 96 $\pm$ 14                    | 10<br>$\pm$ 2 |
| <b>Empty liposomes</b>             | >2000            | NA                       |                 | NA                       |               | NA                        |               | NA                             |               |

**Note:** Values represent the means  $\pm$  standard deviations of three or more independent experiments;  $\Sigma$ -CRG/Ech - complex of carrageenan  $\Sigma$ -CRG with echinochrome A; Liposomes  $\Sigma$ -CRG/Ech - liposomal form of this complex; IC<sub>50</sub>, concentration that inhibited 50% of viral plaque formation; SI, selectivity index (CC<sub>50</sub>/IC<sub>50</sub>); NA - no activity. \* Significance of the differences between the parameters of complex of carrageenan  $\Sigma$ -CRG/Ech compared to the liposomal form of this complex ( $p \leq 0.05$ )

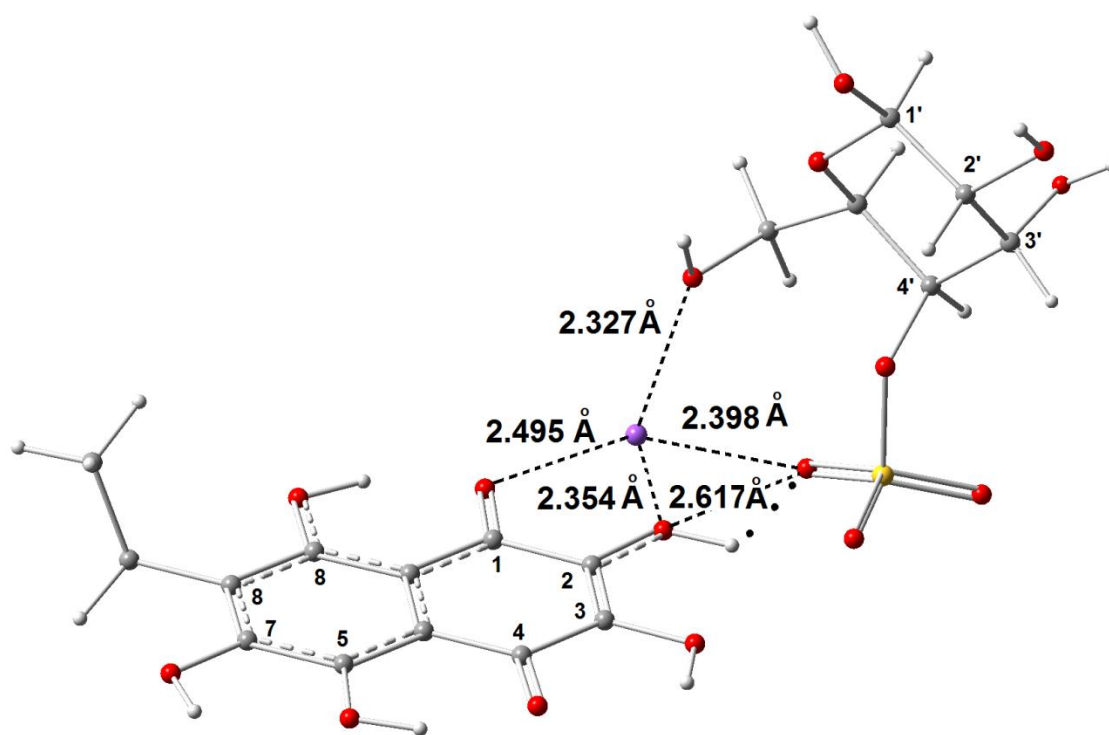

Figure S1. PCM-B3LYP/6-31+G(d,p) optimized geometries of the most stable complex  $\kappa$ -CRGS with Ech at positions C(1)=O and C(2)-OH («k-CRG-Na-1'2-Ech»)

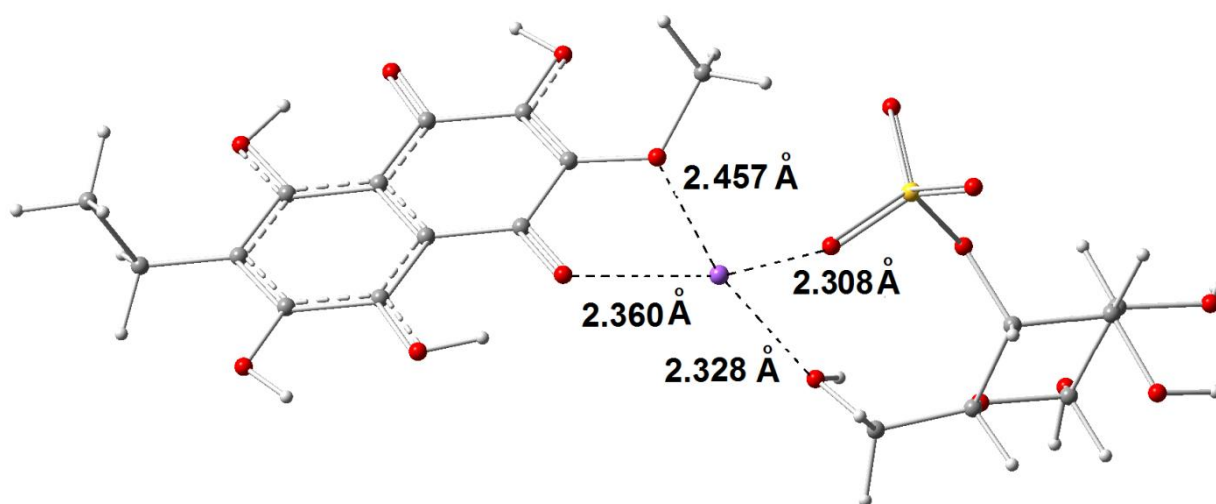

Figure S2. PCM-B3LYP/6-31+G(d,p) optimized geometries of the complex  $\kappa$ -CMS with 3-OMe-Ech at positions C(3)-O and C(4)=O («k-Car-Na-1'2-Ech»)  
«k-Car-Na-3'4-3OMe-Ech»

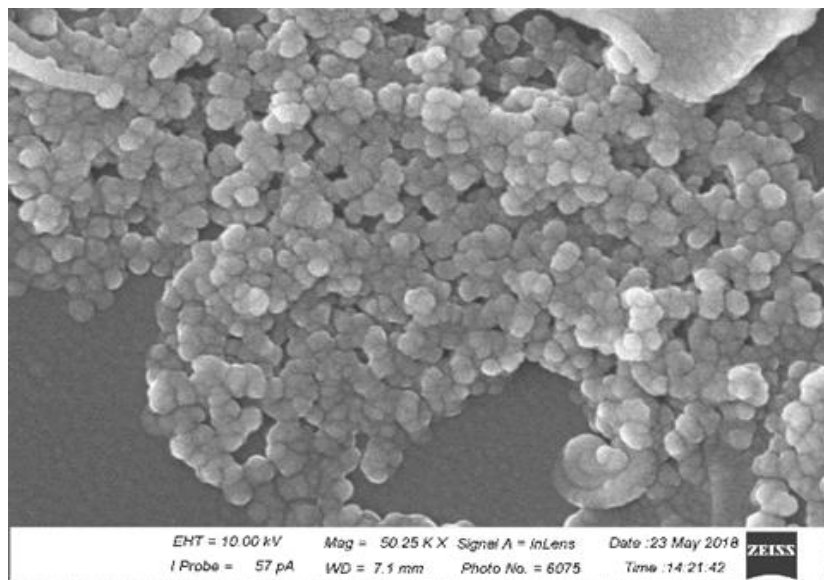

Figure S3. Scanning electron microscopy images of CRG/Ech-containing liposomes. Mag. = 50.87 KX, EHT = 10.00 kV
